# Supplementary material for: CORE_TF: a user-friendly interface to identify evolutionary conserved transcription factor binding sites in sets of co-regulated genes
Source: PubMed Central journal article supplement (PMC2613159; doi:10.1186/1471-2105-9-495), 2008-11-26
Supplement: 1471-2105-9-495-S4.pdf [file 1471-2105-9-495-S4.pdf]

**TransFactor confirmation MyoD binds the  
LAMA4 (ENSG00000112769:ENST00000230538) promoter**

Author: Matthew Hestand

Date: September 2008

**Materials:**

-TransFactor Kit (Clontech product 631956)

-Oligos: (ordered from Operon, bring up in TE to 100µm)

LAMA4\_MyoD\_F     biotin- tgctttcCACCAGCTGTGCgaccttg

LAMA4\_MyoD\_R             caaggctgcacagctggtggaaacga

Neg\_MyoD\_F             biotin- tgctttcCTCGAGGAGTGCgaccttg

Neg\_MyoD\_R             caaggctgcactcctcgaggaaagca

\* red highlight is the mutated nucleotides from the original target sequence

-Antibodies:

Primary: Santa Cruz MyoD (M-318): sc-760

Secondary: goat anti rabbit IgG-HRP from TransFactor Kit

-Protein:

Recombinant MyoD protein

-Plate Reader:

BIO-TEK Synergy HT

**Methods:**

Oligo preparation is done as:

-mix 10ul forward + 10ul reverse oligo

-place 95°C heat block 10 minutes

-cool on desktop 30 minutes

-mix 2ul with 198ul Mg to make 1 µM concentration, vortex briefly

The TransFactor Kit User Manual: V. Colorimetric TransFactor ELISA Procedure is followed with the following additions/changes:

-dilute MyoD antibody 1:100

-dilute goat anti rabbit antibody 1:1000

-step F1: after adding the TMB substrate place directly into the reader

-plate reader protocol:

1. Kinetic- 13x5minute intervals
2. Absorbance
3. Wavelength: 655nm

#### 4. Shake 30s/read

##### Results:

Measurements over 5 time points:

slope: Tn-T(n-1)

| T2-T1 sample | 9-26-06     | 9-29-06     | 10/06/06    |
|--------------|-------------|-------------|-------------|
| Neg_MyoD     | 0.01 0.008  | 0.003 0.005 | 0.027 0.028 |
| LAMA4_MyoD   | 0.021 0.034 | 0.026 0.03  | 0.612 0.455 |

T3-T2 sample

|            |             |             |             |
|------------|-------------|-------------|-------------|
| Neg_MyoD   | 0.008 0.007 | 0.001 0.003 | 0.023 0.022 |
| LAMA4_MyoD | 0.019 0.029 | 0.024 0.024 | 0.48 0.355  |

T4-T3 sample

|            |             |             |             |
|------------|-------------|-------------|-------------|
| Neg_MyoD   | 0.007 0.006 | 0.001 0.001 | 0.017 0.02  |
| LAMA4_MyoD | 0.017 0.024 | 0.019 0.02  | 0.387 0.292 |

T5-T4 sample

|            |             |             |             |
|------------|-------------|-------------|-------------|
| Neg_MyoD   | 0.007 0.006 | 0 0.003     | 0.017 0.017 |
| LAMA4_MyoD | 0.015 0.02  | 0.019 0.019 | 0.322 0.246 |

Gnumeric spreadsheet Anova single factor results:

| Groups       | Count | Sum   | Average | Variance |
|--------------|-------|-------|---------|----------|
| measurements | 48    | 3.756 | 0.07825 | 0.02247  |
| sample       | 48    | 72    | 1.5     | 0.25532  |
| day          | 48    | 96    | 2       | 0.68085  |

ANOVA

| Source of Variation | SS      | df  | MS      | F       | P-value | F critical |
|---------------------|---------|-----|---------|---------|---------|------------|
| Between Groups      | 95.4319 | 2   | 47.7160 | 149.324 | 1.5E-35 | 3.06029    |
| Within Groups       | 45.0561 | 141 | 0.31955 |         |         |            |
| Total               | 140.488 | 143 |         |         |         |            |

Conclusion:

With a p-value of 1.5E-35 there is a very significant difference in MyoD binding between the negative and target oligos. It is therefore highly likely that the target sequence is a binding site for MyoD.
